1 **Title:** Diverse laboratory colonies of *Aedes aegypti* harbor the same adult midgut  
2 bacterial microbiome

3

4 **Authors:** Laura B. Dickson<sup>1\*</sup>, Amine Ghozlane<sup>2,3</sup>, Stevann Volant<sup>2</sup>, Christiane  
5 Bouchier<sup>3</sup>, Laurence Ma<sup>3</sup>, Anubis Vega-Rúa<sup>4</sup>, Isabelle Dusfour<sup>5</sup>, Davy Jiolle<sup>6,7</sup>,  
6 Christophe Paupy<sup>6,7</sup>, Martin N. Mayanja<sup>8</sup>, Alain Kohl<sup>9</sup>, Julius J. Lutwama<sup>8</sup>, Veasna  
7 Duong<sup>10</sup>, Louis Lambrechts<sup>1\*</sup>

8 **Affiliations:**

9 <sup>1</sup>Insect-Virus Interactions Group, Department of Genomes and Genetics, Institut  
10 Pasteur, CNRS URA 3012, Paris, France

11 <sup>2</sup>Bioinformatics and Biostatistics Hub, C3BI, USR 3756 CNRS, Institut Pasteur,  
12 Paris, France

13 <sup>3</sup>Genomics Facility – Biomics Pole, CITECH, Institut Pasteur, Paris, France

14 <sup>4</sup>Laboratory of Medical Entomology, Environment and Health Unit, Institut  
15 Pasteur de la Guadeloupe, Guadeloupe, France

16 <sup>5</sup>Vector Control and Adaptation, Institut Pasteur de la Guyane, Vectopole  
17 Amazonien Emile Abonnenc, Cayenne, French Guiana

18 <sup>6</sup>MIVEGEC, IRD, CNRS, Univ. Montpellier, Montpellier, France

19 <sup>7</sup>Centre International de Recherches Médicales de Franceville, Franceville, Gabon

20 <sup>8</sup>Department of Arbovirology, Uganda Virus Research Institute, Entebbe, Uganda

21 <sup>9</sup>MRC-University of Glasgow Centre for Virus Research, Glasgow, United Kingdom

22 <sup>10</sup>Virology Unit, Institut Pasteur in Cambodia, Phnom Penh, Cambodia

23 \*Corresponding authors: [laura.dickson@pasteur.fr](mailto:laura.dickson@pasteur.fr) (LBD);

24 [louis.lambrechts@pasteur.fr](mailto:louis.lambrechts@pasteur.fr) (LL)

25

## 26 **Abstract**

27 **Background:** Host-associated microbes, collectively known as the microbiota,  
28 play an important role in the biology of multicellular organisms. In mosquito  
29 vectors of human pathogens, the gut bacterial microbiota influences vectorial  
30 capacity and has become the subject of intense study. In laboratory studies of  
31 vector biology, genetic effects are often inferred from differences between  
32 geographically and genetically diverse colonies of mosquitoes that are reared in  
33 the same insectary. It is unclear, however, to what extent genetic effects can be  
34 confounded by uncontrolled differences in the microbiota composition among  
35 mosquito colonies. To address this question, we used 16S metagenomics to  
36 compare the midgut bacterial microbiome of six recent laboratory colonies of  
37 *Aedes aegypti* representing the geographical range and genetic diversity of the  
38 species.

39 **Results:** We found that the diversity, abundance, and community structure of the  
40 midgut bacterial microbiome was remarkably similar among the six different  
41 colonies of *Ae. aegypti*, regardless of their geographic origin. We also confirmed  
42 the relatively low complexity of bacterial communities inhabiting the mosquito  
43 midgut.

44 **Conclusions:** Our finding that geographically diverse colonies of *Ae. aegypti*  
45 reared in the same insectary harbor a similar gut bacterial microbiome supports  
46 the conclusion that the gut microbiota of adult mosquitoes is environmentally  
47 determined regardless of the host genotype. Thus, uncontrolled differences in  
48 microbiota composition are unlikely to represent a significant confounding factor  
49 in genetic studies of vector biology.

50 **Keywords:** Mosquito; Microbiota; Vectorial capacity; Metagenomics.

## 51 **Background**

52           The mosquito, *Aedes aegypti*, is the main vector of several medically  
53 important arboviruses such as Zika, dengue, chikungunya, and yellow fever  
54 viruses worldwide. Dengue viruses alone are responsible for 390 million human  
55 infections each year [1]. In the absence of vaccines or specific therapeutics for  
56 most arboviruses, controlling mosquito vector populations is the primary disease  
57 prevention strategy [2]. With the rise of insecticide resistance, the development of  
58 novel entomological interventions is underway [3, 4]. Critical to the development  
59 of these new vector control methods is an improved understanding of the biology  
60 of mosquito vectors such as *Ae. aegypti* [5].

61           Over the last several decades, research efforts have focused on trying to  
62 elucidate the genetic [6-8] and environmental [9-12] factors that contribute to  
63 variation in the ability of *Ae. aegypti* to transmit human pathogens. Only in recent  
64 years, however, has the importance of the microbiota (i.e., host-associated  
65 microbes) emerged in vector biology. The gut bacterial microbiota, in particular,  
66 influences multiple aspects of the mosquito's biology including vector competence  
67 [13, 14] and has become a topic of extensive research. Manipulation of the  
68 bacterial species present in the mosquito midgut has been shown to both increase  
69 or decrease the amounts of dengue virus, chikungunya virus, or *Plasmodium*  
70 *falciparum* [15-19]. The composition of the microbiome (i.e., the collective  
71 genomes of the microbiota) found in the midgut of mosquitoes is highly variable  
72 and dependent on the environment [20-23] and life stage [24-26].

73           To identify mosquito genetic components of vectorial capacity, researchers  
74 often use genetically diverse colonies of mosquitoes reared in the same  
75 environment. Observed differences in the vectorial capacity of genetically diverse

76 laboratory colonies is generally attributed to host genetics, and not to potential  
77 differences in the gut microbiota, but it remains poorly understood what role  
78 mosquito genetics plays in shaping the gut microbiome and whether subtle  
79 differences in the microbiome could confound genetic studies. It was recently  
80 shown that the gut microbiota can be disrupted by genetic modification of  
81 mosquitoes [27]. In more natural insect systems such as the relationship between  
82 aphids, intracellular bacteria, and parasitic wasps, bacterial symbionts and not the  
83 aphid genotype drive the specificity of the interactions between the aphid and the  
84 parasitic wasp [28-30]. In other insects, it has been demonstrated that the gut  
85 microbiota contributes to host genotype by parasite genotype interactions [31],  
86 suggesting that differences in the microbiota should be considered as an  
87 additional factor when elucidating the host genetic contribution to a specific trait.

88         In *Ae. aegypti*, previous observations of bacterial taxa specific to certain  
89 mosquito lines reared in the same insectary [32, 33] raise the question whether  
90 differences in gut microbiota could confound interpretation of phenotypic  
91 differences among mosquito colonies. To address this question, we used a  
92 targeted metagenomics approach to compare the gut microbiome between six  
93 recent colonies of *Ae. aegypti* representing the geographical range and genetic  
94 diversity of the species. We performed a comprehensive metagenomics analysis  
95 including comparison of bacterial diversity within and between samples as well  
96 as identifying bacterial genera that are differentially abundant between colonies.  
97 Our results provide empirical evidence that adult *Ae. aegypti* mosquitoes reared  
98 in the same insectary harbor a similar gut bacterial microbiome, regardless of  
99 their geographic origin.

100

## 101 **Results**

102           To test if laboratory colonies of natural populations of *Ae. aegypti* differ in  
103 the diversity and composition of their gut microbiome, the V5-V6 variable region  
104 of the 16S ribosomal RNA gene was sequenced in 16-18 individual adult female  
105 midguts from each of six recent colonies of *Ae. aegypti*. The six colonies chosen  
106 represent the geographical range and genetic diversity of the species (Figure 1)  
107 and have spent from three to ten generations in the laboratory (Table 1). The  
108 experimental design included three replicate adult cages per colony and the  
109 individual libraries were randomized across two separate sequencing runs.  
110 Individual midguts were aseptically dissected from nulliparous, 4- to 6-day-old  
111 females that had been allowed to mate and feed on sugar following emergence.  
112 Out of the 96 individual gut microbiomes sequenced, 2,679 operational taxonomic  
113 units (OTUs) representing 587 different bacterial genera were identified.  
114 Rarefaction curves showed that a sufficient number of sequencing reads was  
115 achieved to comprehensively characterize the bacterial communities in the  
116 midgut (Supplemental Figure 1).

117           To determine if the gut microbiome of each *Ae. aegypti* colony varies in the  
118 diversity of bacterial species present, the within-colony diversity was evaluated  
119 by determining the genus richness and the Shannon diversity index. No  
120 differences in the levels of richness (Figure 2A) or in Shannon diversity index  
121 (Figure 2B) were observed between the colonies (ANOVA:  $F = 1.125$ ,  $p$  value =  
122 0.353 and  $F = 0.522$ ,  $p$  value = 0.759, respectively). In addition, the taxonomical  
123 abundance of bacteria was highly similar between the colonies, indicating the  
124 dominant bacterial genera in the midgut are not dependent on the colony (Figure  
125 3).

126 To identify dissimilarities in the bacterial community structure between  
127 the gut microbiome of laboratory colonies of *Ae. aegypti*, principal coordinates  
128 analysis (PCoA) was performed based on a Bray-Curtis dissimilarity matrix. The  
129 PCoA showed that the bacterial community structures of all six colonies were  
130 highly similar to each other ( $p$  value = 0.752) (Figure 4A). In addition, no  
131 differences in the bacterial community structure were observed between the  
132 replicate cages of each colony, however the bacterial community structure  
133 differed between sequencing runs (Supplemental Figure 2). The reason for the run  
134 effect is unclear but it could reflect preferential clustering of specific sequences on  
135 the flow cell. Although the community structure of gut microbiome of the colonies  
136 was similar overall, we tested whether some specific bacterial taxa were  
137 differentially abundant. Out of the 587 bacterial genera identified, only zero to six  
138 genera were differentially abundant in pairwise comparisons of the six colonies  
139 (Supplemental Table 1; Figure 4B) resulting in 98-100% similarity in the  
140 abundance of genera present between colonies.

141

## 142 **Discussion**

143 We performed a 16S metagenomics analysis to compare the midgut  
144 microbiome of six recent colonies of *Ae. aegypti* reared in the same insectary  
145 environment. The six colonies were chosen to represent the natural global  
146 distribution of the species. Although these colonies represent different genetic  
147 backgrounds and different generation times in the laboratory, the gut microbiome  
148 was highly similar among all six colonies. We did not observe any differences in  
149 the diversity of the bacterial communities or in the bacterial community structure

150 within the gut. The taxonomical abundance was also similar between the colonies  
151 with 98-100% identity in the abundance of bacterial genera present between  
152 colonies. The data also confirmed the relatively low complexity of bacterial  
153 communities typically found in the gut of insects [34, 35].

154 Other studies that have compared the midgut microbiome of various  
155 laboratory colonies of *Ae. aegypti* observed differences in the taxonomical  
156 identification of specific bacterial species [32, 33]. Although these studies  
157 reported differences in the abundance of specific taxa between colonies of *Ae.*  
158 *aegypti*, no difference in the bacterial community structure was in fact observed.  
159 Furthermore, the colonies tested in previous studies have been maintained in the  
160 laboratory for five to 80 years before their microbiome was examined. It is  
161 possible that large differences in the number of generations spent in the  
162 laboratory between these studies and ours, resulted in our different observations.  
163 Possibly, preferential associations between mosquito genotypes and specific  
164 laboratory bacteria may evolve over a long colonization history. This hypothesis  
165 remains to be tested.

166 Researchers often use genetically diverse colonies of mosquitoes reared in  
167 the same environment to identify mosquito genetic components of vectorial  
168 capacity. In such studies, differences in microbiota could confound interpretation  
169 of phenotypic differences among mosquito colonies. The present study does not  
170 support this hypothesis in the case of *Ae. aegypti*. While this may be the case in  
171 some insect systems [28-31], our study provides evidence that the midgut  
172 microbiome of colonized *Ae. aegypti* is highly similar and most likely will not  
173 confound genetic studies of vector biology.

174           Although we did not genotype the *Ae. aegypti* colonies used in this study, it  
175 is well accepted that *Ae. aegypti* from sub-Saharan Africa belong to a different  
176 phylogenetic cluster than pan-tropical *Ae. aegypti* from elsewhere in the world  
177 [36-40]. At a more local scale, populations of *Ae. aegypti* sampled from distinct  
178 locations are usually genetically distinct [41-43]. Accordingly, we assume that the  
179 colonies that we tested in fact represent various genotypes of *Ae. aegypti*. We  
180 conclude that mosquito genotype does not influence the microbiome of  
181 laboratory-bred *Ae. aegypti*, further demonstrating the importance that the  
182 environment plays in shaping the gut microbiome of *Ae. aegypti*. However, this  
183 may not be the case in a more natural system. One can imagine that within a given  
184 environment, the mosquito genotype may influence the composition of the midgut  
185 microbiome and this should be explored further.

186           A limitation of our study was that we only dissected midguts at one time  
187 point. Recent results from Short et al. [33] suggest that differences between  
188 colonies may exist at different times following adult emergence. It is possible that  
189 differences in the gut microbiome between our colonies would have been  
190 observed if we had sampled the midguts sooner or later after adult emergence.  
191 Since our primary goal was to determine how the gut microbiome of our colonies  
192 impacted studies of vector competence, we chose a time point after adult  
193 emergence that related to the time when an infectious blood meal is usually  
194 offered in vector competence assays.

195           One potentially important implication of our results is that the same  
196 mosquito strain reared in different laboratories might display different  
197 phenotypes due to a different gut microbiome. We found that the gut microbiome  
198 of mosquito colonies was entirely determined by the insectary environment



199 regardless of the mosquito genotype. It follows that the same mosquito strain  
200 exposed to a different environment could host a different gut microbiota. This  
201 could undermine the relevance of reference strains that are shared by different  
202 laboratories. It will be interesting in future studies to compare the gut bacterial  
203 microbiome of the same mosquito strain reared in different insectaries.

204

## 205 **Conclusions**

206 Our finding that geographically diverse colonies of *Ae. aegypti* reared in the  
207 same insectary harbor a similar gut bacterial microbiome supports the conclusion  
208 that the gut microbiota of adult mosquitoes is environmentally determined,  
209 regardless of the host genotype. Thus, uncontrolled differences in microbiota  
210 composition are unlikely to represent a significant confounding factor in genetic  
211 studies of vector biology.

212

## 213 **Methods**

### 214 **Mosquito colonies and sample preparation**

215 Six *Ae. aegypti* colonies were chosen to represent the worldwide distribution of  
216 the species (Figure 1; Table 1). Eggs from each of these colonies were  
217 simultaneously hatched in dechlorinated tap water under reduced air pressure for  
218 one hour and 200 first-instar larvae from each colony were sorted into 24 x 34 x  
219 9 cm plastic trays. The larvae were fed on a standard diet of Tetramin fish food  
220 (Tetra) every other day until pupation. Immediately following emergence, adults  
221 (males and females) were randomly separated into three replicate cages per  
222 mosquito colony. They were maintained under standard insectary conditions

223 (28°C, 70% relative humidity and 12h light: 12h dark cycle) for 4-6 days and  
224 allowed to mate and feed on sugar.

225 Midguts were dissected from adult females under sterile conditions in a  
226 biosafety cabinet. Each mosquito was surface sterilized in 70% ethanol for 3-5  
227 minutes and washed three times in sterile 1x phosphate-buffered saline (PBS).  
228 Midguts were dissected in a drop of sterile 1x PBS and DNA from individual  
229 midguts was extracted as previously reported [9]. Briefly, individual midguts were  
230 ground in 300 µl of 20 mg/ml lysozyme dissolved in Qiagen ATL buffer in a sterile  
231 tube containing grinding beads. The samples were homogenized for two rounds  
232 of 30 seconds at 6,700 RPM (Precellys 24, Bertin Technologies) and DNA was  
233 extracted following the Qiagen DNeasy recommended pre-treatment protocol for  
234 Gram-positive bacterial samples. To control for contamination of bacteria  
235 introduced during the midgut dissections, DNA extractions, and PCR steps,  
236 negative controls were made by extracting DNA from blank 1x PBS that was used  
237 during the washing steps and by performing negative PCR reactions.

### 238 **16S sequencing**

239 Custom-made PCR primers were designed to amplify the hypervariable V5-V6  
240 region of the bacterial 16S ribosomal RNA gene from midguts as previously  
241 described [9]. Purified DNA from each midgut sample was amplified in triplicate  
242 by 40 cycles of PCR using Expand High-Fidelity polymerase (Sigma-Aldrich)  
243 following manufacturer instructions. To improve PCR sensitivity, 0.15 µl  
244 T4gene32 and 0.5 µl 20mg/ml bovine serum albumin (BSA) were added per  
245 reaction with 6 µl of template DNA. The three PCR reactions were pooled and the  
246 PCR products purified using Agencourt AMPure XP magnetic beads (Beckman  
247 Coulter). The purified PCR products were quantified by Quant-iT PicoGreen

248 dsDNA fluorometric quantification (ThermoFisher Scientific) and pooled for  
249 sequencing in paired-end on the Illumina MiSeq platform using the 500-cycle v2  
250 chemistry (Illumina). On average, 16-18 individual midguts (6 individuals per  
251 adult replicate cage) were sequenced per *Ae. aegypti* colony. In order to achieve  
252 enough reads per sample, the sequencing was done in two separate runs. Libraries  
253 from each colony and each replicate were dispersed evenly between the two  
254 sequencing runs. Five libraries were removed from further analysis due to a low  
255 number of reads. Raw sequences were deposited to the European Nucleotide  
256 Archive under accession number PRJEB22905.

### 257 **Data analysis**

258 To account for possible contamination at various steps in the sample-processing  
259 pipeline, the sequencing reads were corrected with the reads from the negative  
260 controls. The sequencing reads from each sample were mapped to the reads found  
261 in the negative controls using Bowtie2 [44]. Reads that mapped to reads in the  
262 negative controls were removed from the analysis. Read filtering, OTU clustering  
263 and annotation were performed with the MASQUE pipeline  
264 (<https://github.com/aghozlane/masque>) as previously described [45]. A total of  
265 2,679 OTUs were obtained at 97% sequence identity threshold. Genus richness  
266 and Shannon diversity index were compared by analysis of variance (ANOVA). All  
267 other statistical analyses were performed with SHAMAN ([shaman.c3bi.pasteur.fr](http://shaman.c3bi.pasteur.fr))  
268 as previously described [9]. Briefly, the normalization of OTU counts was  
269 performed at the OTU level using the DESeq2 normalization method. After  
270 normalization, an additional six individuals were removed due to low size factors.  
271 In SHAMAN, a generalized linear model (GLM) was fitted and vectors of contrasts  
272 were defined to determine the significance in abundance variation between

273 sample types. The GLM included the main effect of the *Ae. aegypti* colony, the main  
274 effect of replicate cage, the main effect of sequencing run and the interaction  
275 between colony and replicate. The resulting  $p$  values were adjusted for multiple  
276 testing according to the Benjamini and Hochberg procedure [46]. Principal  
277 coordinates analysis (PCoA) was performed with the ade4 R package (v1.7.6)  
278 using a Bray-Curtis dissimilarity matrix. Permutational multivariate analysis of  
279 variance (PERMANOVA) was performed in the vegan R package (v2.4.3) as a  
280 distance-based method to test the statistical significance of the association  
281 between bacterial community structure and mosquito colony.

282

### 283 **Funding**

284 This work was supported by Agence Nationale de la Recherche (grants ANR-16-  
285 CE35-0004-01 and ANR-17-ERC2-0016-01 to LL), the French Government's  
286 Investissement d'Avenir program Laboratoire d'Excellence Integrative Biology of  
287 Emerging Infectious Diseases (grant ANR-10-LABX-62-IBEID to LL), the City of  
288 Paris Emergence(s) program in Biomedical Research (to LL), the European  
289 Union's Horizon 2020 research and innovation programme under ZikaPLAN grant  
290 agreement No 734584 (to LL), the European Union and Guadeloupe Region  
291 (Programme Opérationnel FEDER-Guadeloupe-Conseil Régional 2014-2020,  
292 grant 2015-FED-192 to AVR) and the United Kingdom Medical Research Council  
293 (grant MC\_UU\_12014 to AK). The Genomics Facility is member of the "France  
294 Génomique" consortium (grant ANR10-INBS-09-08 to CB). The funders had no  
295 role in study design, data collection and interpretation, or the decision to submit  
296 the work for publication.

### 297 **Authors' contributions**

298 LBD and LL designed the study. AVR, ID, DJ, CP, MNM, AK, JLL, and VD provided  
299 mosquito specimens to initiate colonies. LBD carried out the experiments. LBD,  
300 CB, and LM performed the sequencing. LBD, AG, SV, and LL analyzed the data. LBD  
301 and LL wrote the manuscript. All authors read and approved the final manuscript.

## 302 **Acknowledgements**

303 We are grateful to Gordana Rašić and Ary Hoffmann for providing the mosquito  
304 colony from Cairns and to Borin Peng for the mosquito collection in Phnom Penh.  
305 We thank Claire Valiente Moro, Guillaume Minard and the Lambrechts lab  
306 members for their insights.

## 307 **References**

- 308 1. Bhatt, S., et al., *The global distribution and burden of dengue*. Nature, 2013.  
309 **496**(7446): p. 504-7.
- 310 2. Wilder-Smith, A., et al., *Epidemic arboviral diseases: priorities for research*  
311 *and public health*. Lancet Infect Dis, 2017. **17**(3): p. e101-e106.
- 312 3. McGraw, E.A. and S.L. O'Neill, *Beyond insecticides: new thinking on an*  
313 *ancient problem*. Nat Rev Microbiol, 2013. **11**(3): p. 181-93.
- 314 4. Lambrechts, L., et al., *Assessing the epidemiological effect of wolbachia for*  
315 *dengue control*. Lancet Infect Dis, 2015. **15**(7): p. 862-6.
- 316 5. Lambrechts, L., et al., *Shifting priorities in vector biology to improve control*  
317 *of vector-borne disease*. Trop Med Int Health, 2009. **14**(12): p. 1505-14.
- 318 6. Bosio, C.F., et al., *Quantitative trait loci that control vector competence for*  
319 *dengue-2 virus in the mosquito Aedes aegypti*. Genetics, 2000. **156**(2): p.  
320 687-98.
- 321 7. Bennett, K.E., et al., *Quantitative trait loci that control dengue-2 virus*  
322 *dissemination in the mosquito Aedes aegypti*. Genetics, 2005. **170**(1): p. 185-  
323 94.
- 324 8. Fansiri, T., et al., *Genetic mapping of specific interactions between Aedes*  
325 *aegypti mosquitoes and dengue viruses*. PLoS genetics, 2013. **9**(8): p.  
326 e1003621.
- 327 9. Dickson, L.B., et al., *Carryover effects of larval exposure to different*  
328 *environmental bacteria drive adult trait variation in a mosquito vector*. Sci  
329 Adv, 2017. **3**(8): p. e1700585.
- 330 10. Lambrechts, L., et al., *Impact of daily temperature fluctuations on dengue*  
331 *virus transmission by Aedes aegypti*. Proceedings of the National Academy  
332 of Sciences of the United States of America, 2011. **108**(18): p. 7460-5.
- 333 11. Westbrook, C.J., et al., *Larval environmental temperature and the*  
334 *susceptibility of Aedes albopictus Skuse (Diptera: Culicidae) to Chikungunya*  
335 *virus*. Vector Borne Zoonotic Dis, 2010. **10**(3): p. 241-7.

- 336 12. Alto, B.W., et al., *Larval Competition Differentially Affects Arbovirus Infection*  
337 *in Aedes Mosquitoes*. Ecology, 2005. **86**(12): p. 3279-3288.
- 338 13. Minard, G., P. Mavingui, and C.V. Moro, *Diversity and function of bacterial*  
339 *microbiota in the mosquito holobiont*. Parasit Vectors, 2013. **6**: p. 146.
- 340 14. Hegde, S., J.L. Rasgon, and G.L. Hughes, *The microbiome modulates arbovirus*  
341 *transmission in mosquitoes*. Curr Opin Virol, 2015. **15**: p. 97-102.
- 342 15. Cirimotich, C.M., J.L. Ramirez, and G. Dimopoulos, *Native microbiota shape*  
343 *insect vector competence for human pathogens*. Cell Host Microbe, 2011.  
344 **10**(4): p. 307-10.
- 345 16. Ramirez, J.L., et al., *Chromobacterium Csp\_P reduces malaria and dengue*  
346 *infection in vector mosquitoes and has entomopathogenic and in vitro anti-*  
347 *pathogen activities*. PLoS Pathog, 2014. **10**(10): p. e1004398.
- 348 17. Ramirez, J.L., et al., *Reciprocal tripartite interactions between the Aedes*  
349 *aegypti midgut microbiota, innate immune system and dengue virus*  
350 *influences vector competence*. PLoS Negl Trop Dis, 2012. **6**(3): p. e1561.
- 351 18. Apte-Deshpande, A., et al., *Serratia odorifera a midgut inhabitant of Aedes*  
352 *aegypti mosquito enhances its susceptibility to dengue-2 virus*. PLoS One,  
353 2012. **7**(7): p. e40401.
- 354 19. Apte-Deshpande, A.D., et al., *Serratia odorifera mediated enhancement in*  
355 *susceptibility of Aedes aegypti for chikungunya virus*. Indian J Med Res, 2014.  
356 **139**(5): p. 762-8.
- 357 20. Zouache, K., et al., *Bacterial diversity of field-caught mosquitoes, Aedes*  
358 *albopictus and Aedes aegypti, from different geographic regions of*  
359 *Madagascar*. FEMS Microbiol Ecol, 2011. **75**(3): p. 377-89.
- 360 21. Coon, K.L., M.R. Brown, and M.R. Strand, *Mosquitoes host communities of*  
361 *bacteria that are essential for development but vary greatly between local*  
362 *habitats*. Mol Ecol, 2016. **25**(22): p. 5806-5826.
- 363 22. Osei-Poku, J., et al., *Deep sequencing reveals extensive variation in the gut*  
364 *microbiota of wild mosquitoes from Kenya*. Mol Ecol, 2012. **21**(20): p. 5138-  
365 50.
- 366 23. Buck, M., et al., *Bacterial associations reveal spatial population dynamics in*  
367 *Anopheles gambiae mosquitoes*. Sci Rep, 2016. **6**: p. 22806.
- 368 24. Gimonneau, G., et al., *Composition of Anopheles coluzzii and Anopheles*  
369 *gambiae microbiota from larval to adult stages*. Infect Genet Evol, 2014. **28**:  
370 p. 715-24.
- 371 25. Coon, K.L., et al., *Mosquitoes rely on their gut microbiota for development*.  
372 Mol Ecol, 2014. **23**(11): p. 2727-39.
- 373 26. Wang, Y., et al., *Dynamic gut microbiome across life history of the malaria*  
374 *mosquito Anopheles gambiae in Kenya*. PLoS One, 2011. **6**(9): p. e24767.
- 375 27. Pike, A., et al., *Changes in the microbiota cause genetically modified*  
376 *Anopheles to spread in a population*. Science, 2017. **357**(6358): p. 1396-  
377 1399.
- 378 28. Oliver, K.M., N.A. Moran, and M.S. Hunter, *Variation in resistance to*  
379 *parasitism in aphids is due to symbionts not host genotype*. Proc Natl Acad  
380 Sci U S A, 2005. **102**(36): p. 12795-800.
- 381 29. Sandrock, C., A. Gouskov, and C. Vorburger, *Ample genetic variation but no*  
382 *evidence for genotype specificity in an all-parthenogenetic host-parasitoid*  
383 *interaction*. J Evol Biol, 2010. **23**(3): p. 578-85.

- 384 30. Vorburger, C., et al., *Genotypic variation and the role of defensive*  
385 *endosymbionts in an all-parthenogenetic host-parasitoid interaction.*  
386 *Evolution*, 2009. **63**(6): p. 1439-50.
- 387 31. Koch, H. and P. Schmid-Hempel, *Gut microbiota instead of host genotype*  
388 *drive the specificity in the interaction of a natural host-parasite system.* *Ecol*  
389 *Lett*, 2012. **15**(10): p. 1095-103.
- 390 32. Charan, S.S., et al., *Comparative analysis of midgut bacterial communities of*  
391 *Aedes aegypti mosquito strains varying in vector competence to dengue virus.*  
392 *Parasitol Res*, 2013. **112**(7): p. 2627-37.
- 393 33. Short, S.M., et al., *Amino acid metabolic signaling influences Aedes aegypti*  
394 *midgut microbiome variability.* *PLoS Negl Trop Dis*, 2017. **11**(7): p.  
395 e0005677.
- 396 34. Engel, P. and N.A. Moran, *The gut microbiota of insects - diversity in structure*  
397 *and function.* *FEMS Microbiol Rev*, 2013. **37**(5): p. 699-735.
- 398 35. Dillon, R.J. and V.M. Dillon, *The gut bacteria of insects: nonpathogenic*  
399 *interactions.* *Annu Rev Entomol*, 2004. **49**: p. 71-92.
- 400 36. Tabachnick, W.J. and J.R. Powell, *A world-wide survey of genetic variation in*  
401 *the yellow fever mosquito, Aedes aegypti.* *Genetical research*, 1979. **34**(3): p.  
402 215-29.
- 403 37. Dickson, L.B., et al., *Exon-Enriched Libraries Reveal Large Genic Differences*  
404 *Between Aedes aegypti from Senegal, West Africa, and Populations Outside*  
405 *Africa.* *G3 (Bethesda)*, 2017. **7**(2): p. 571-582.
- 406 38. Brown, J.E., et al., *Human impacts have shaped historical and recent*  
407 *evolution in Aedes aegypti, the dengue and yellow fever mosquito.* *Evolution;*  
408 *international journal of organic evolution*, 2014. **68**(2): p. 514-25.
- 409 39. Brown, J.E., et al., *Worldwide patterns of genetic differentiation imply*  
410 *multiple 'domestications' of Aedes aegypti, a major vector of human diseases.*  
411 *Proceedings. Biological sciences / The Royal Society*, 2011. **278**(1717): p.  
412 2446-54.
- 413 40. Crawford, J.E., et al., *Population genomics reveals that an anthropophilic*  
414 *population of Aedes aegypti mosquitoes in West Africa recently gave rise to*  
415 *American and Asian populations of this major disease vector.* *BMC Biol*,  
416 2017. **15**(1): p. 16.
- 417 41. Gloria-Soria, A., et al., *Global genetic diversity of Aedes aegypti.* *Mol Ecol*,  
418 2016. **25**(21): p. 5377-5395.
- 419 42. Bosio, C.F., et al., *Genetic structure of Aedes aegypti populations in Thailand*  
420 *using mitochondrial DNA.* *The American journal of tropical medicine and*  
421 *hygiene*, 2005. **72**(4): p. 434-42.
- 422 43. Garcia-Franco, F., et al., *Large genetic distances among Aedes aegypti*  
423 *populations along the South Pacific coast of Mexico.* *Am J Trop Med Hyg*,  
424 2002. **66**(5): p. 594-8.
- 425 44. Langmead, B. and S.L. Salzberg, *Fast gapped-read alignment with Bowtie 2.*  
426 *Nat Methods*, 2012. **9**(4): p. 357-9.
- 427 45. Quereda, J.J., et al., *Bacteriocin from epidemic Listeria strains alters the host*  
428 *intestinal microbiota to favor infection.* *Proc Natl Acad Sci U S A*, 2016.  
429 **113**(20): p. 5706-11.
- 430 46. Hochberg, Y.B.a.Y., *Controlling the False Discovery Rate: A Practical and*  
431 *Powerful Approach to Multiple Testing.* *Journal of the Royal Statistical*  
432 *Society*, 1995. **57**(1).

- 433 47. Kraemer, M.U., et al., *The global distribution of the arbovirus vectors Aedes*  
434 *aegypti and Ae. albopictus*. *Elife*, 2015. **4**: p. e08347.
- 435 48. Kraemer, M.U., et al., *The global compendium of Aedes aegypti and Ae.*  
436 *albopictus occurrence*. *Sci Data*, 2015. **2**: p. 150035.
- 437



## 438 **Figure Legends**

439 **Figure 1:** World map showing the origin of the *Ae. aegypti* colonies used in the  
440 study overlaid with the approximate global distribution of *Ae. aegypti* adapted  
441 from Kraemer et al. [47, 48]. The colonies were initiated on different years and  
442 represent different generation times in the laboratory (Table 1).

443

444 **Figure 2:** Genetic diversity of the gut bacterial communities is similar between  
445 diverse colonies of *Ae. aegypti*. The genus richness (a) and Shannon diversity index  
446 (b) were calculated for each colony representing 16-18 individual midguts from 3  
447 replicate cages dissected 4-6 days after adult emergence. Genus richness is the  
448 number of bacterial genera identified in each colony. The Shannon diversity index  
449 accounts for the relative abundance of each bacterial genus. Error bars represent  
450 95% confidence intervals. No difference in richness (ANOVA:  $F = 1.125$ ,  $p$  value =  
451 0.353) or in Shannon index (ANOVA:  $F = 0.522$ ,  $p$  value = 0.759) was detected  
452 between colonies.

453

454 **Figure 3:** The dominant bacterial genera found in the midgut are similar among  
455 diverse colonies of *Ae. aegypti*. The abundance of the 12 most abundant genera is  
456 shown for each colony representing 16-18 individual midguts from 3 replicate  
457 cages dissected 4-6 days after adult emergence. Bacterial genera were assigned to  
458 OTUs clustered with a 97% cutoff using the SILVA database ([https://www.arb-](https://www.arb-silva.de)  
459 [silva.de](https://www.arb-silva.de)).

460

461 **Figure 4:** The midgut bacterial community structure is similar between diverse  
462 colonies of *Ae. aegypti*. Bacterial community structures between colonies are

463 compared by (a) principal coordinates analysis (PCoA) and (b) pairwise  
464 differential abundance analysis. PCoA is based on a Bray-Curtis dissimilarity  
465 matrix and indicates a lack of overall differences (PERMANOVA:  $p$  value = 0.752).  
466 Results of differential abundance analysis are shown for each pair of colonies as  
467 the proportion of all bacterial genera identified ( $n=587$ ) that were non-  
468 significantly differentially abundant after correction for multiple testing.

469

470 **Supplemental Table 1:** Identification of bacterial genera that are differentially  
471 abundant in pairwise comparisons of colonies. The lack of a comparison between  
472 two colonies indicates that no bacterial genera were significantly different  
473 between them.

474

475 **Supplemental Figure 1:** Rarefaction curves for the individual samples used in the  
476 analysis at the genera level. The curves show the number of detected bacterial  
477 genera as a function of the number of reads analyzed per sequencing library. Each  
478 curve represents a single midgut sample.

479

480 **Supplemental Figure 2:** The midgut bacterial communities are highly structured  
481 by sequencing run. The cluster dendrogram of individual midgut samples based  
482 on a Bray-Curtis dissimilarity matrix shows that sequencing run, and not the  
483 identity of the mosquito colony, determines bacterial community relatedness.  
484 Midgut samples are represented by numbers color coded by sequencing run. Dark  
485 blue samples were sequenced in the first run, whereas light blue samples were  
486 sequenced in the second run.

487

488 **Table**

489

490 Table 1. *Aedes aegypti* colonies included in this study. The country and region of  
491 origin, year of collection, and number of generations spent in the laboratory prior  
492 to the study are shown.

| <b>Country</b> | <b>Region</b>  | <b>Year</b> | <b>Generation</b> |
|----------------|----------------|-------------|-------------------|
| Australia      | Cairns         | 2013        | 10                |
| Cambodia       | Phnom Penh     | 2015        | 7                 |
| French Guiana  | Cayenne        | 2015        | 4                 |
| Gabon          | Bakoumba       | 2014        | 10                |
| Guadeloupe     | Saint François | 2015        | 5                 |
| Uganda         | Zika           | 2016        | 3                 |

493

Figure 1

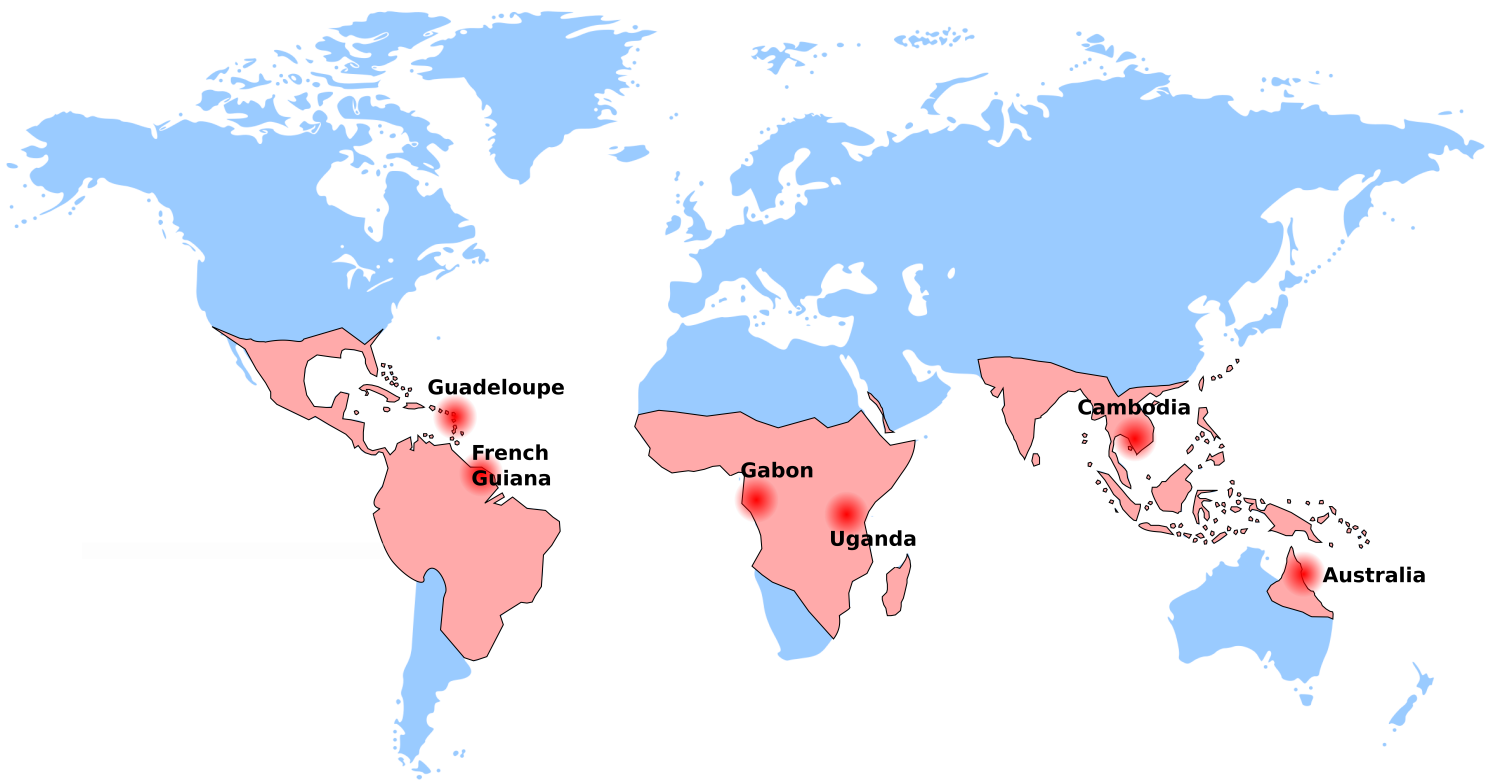

Figure 2

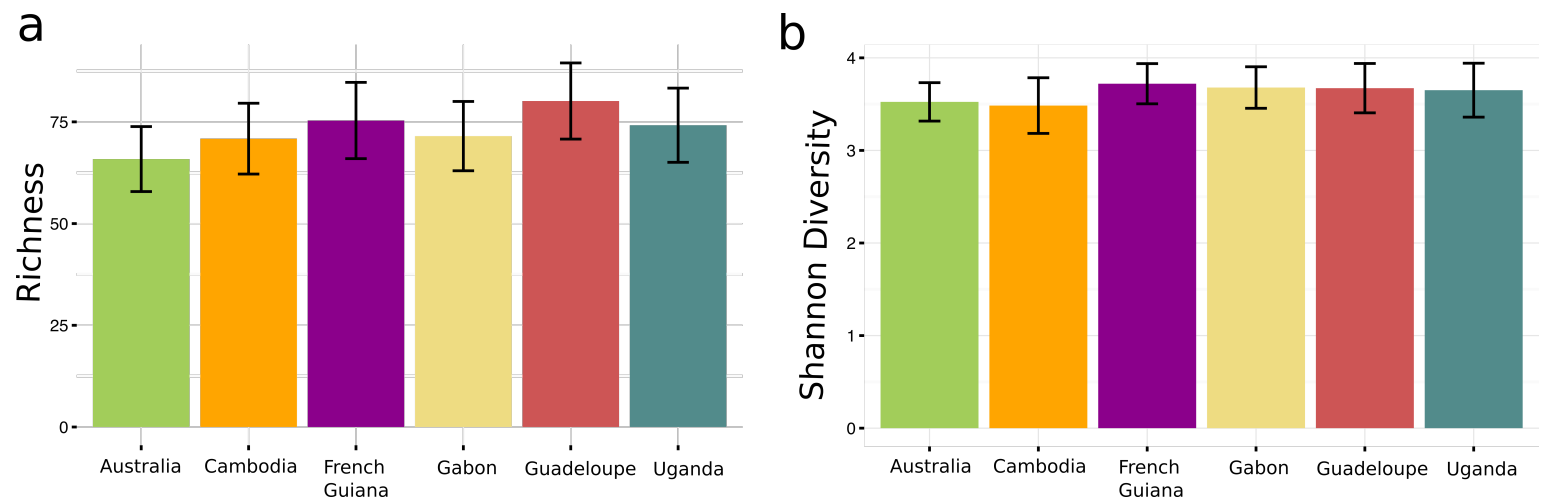

Figure 3

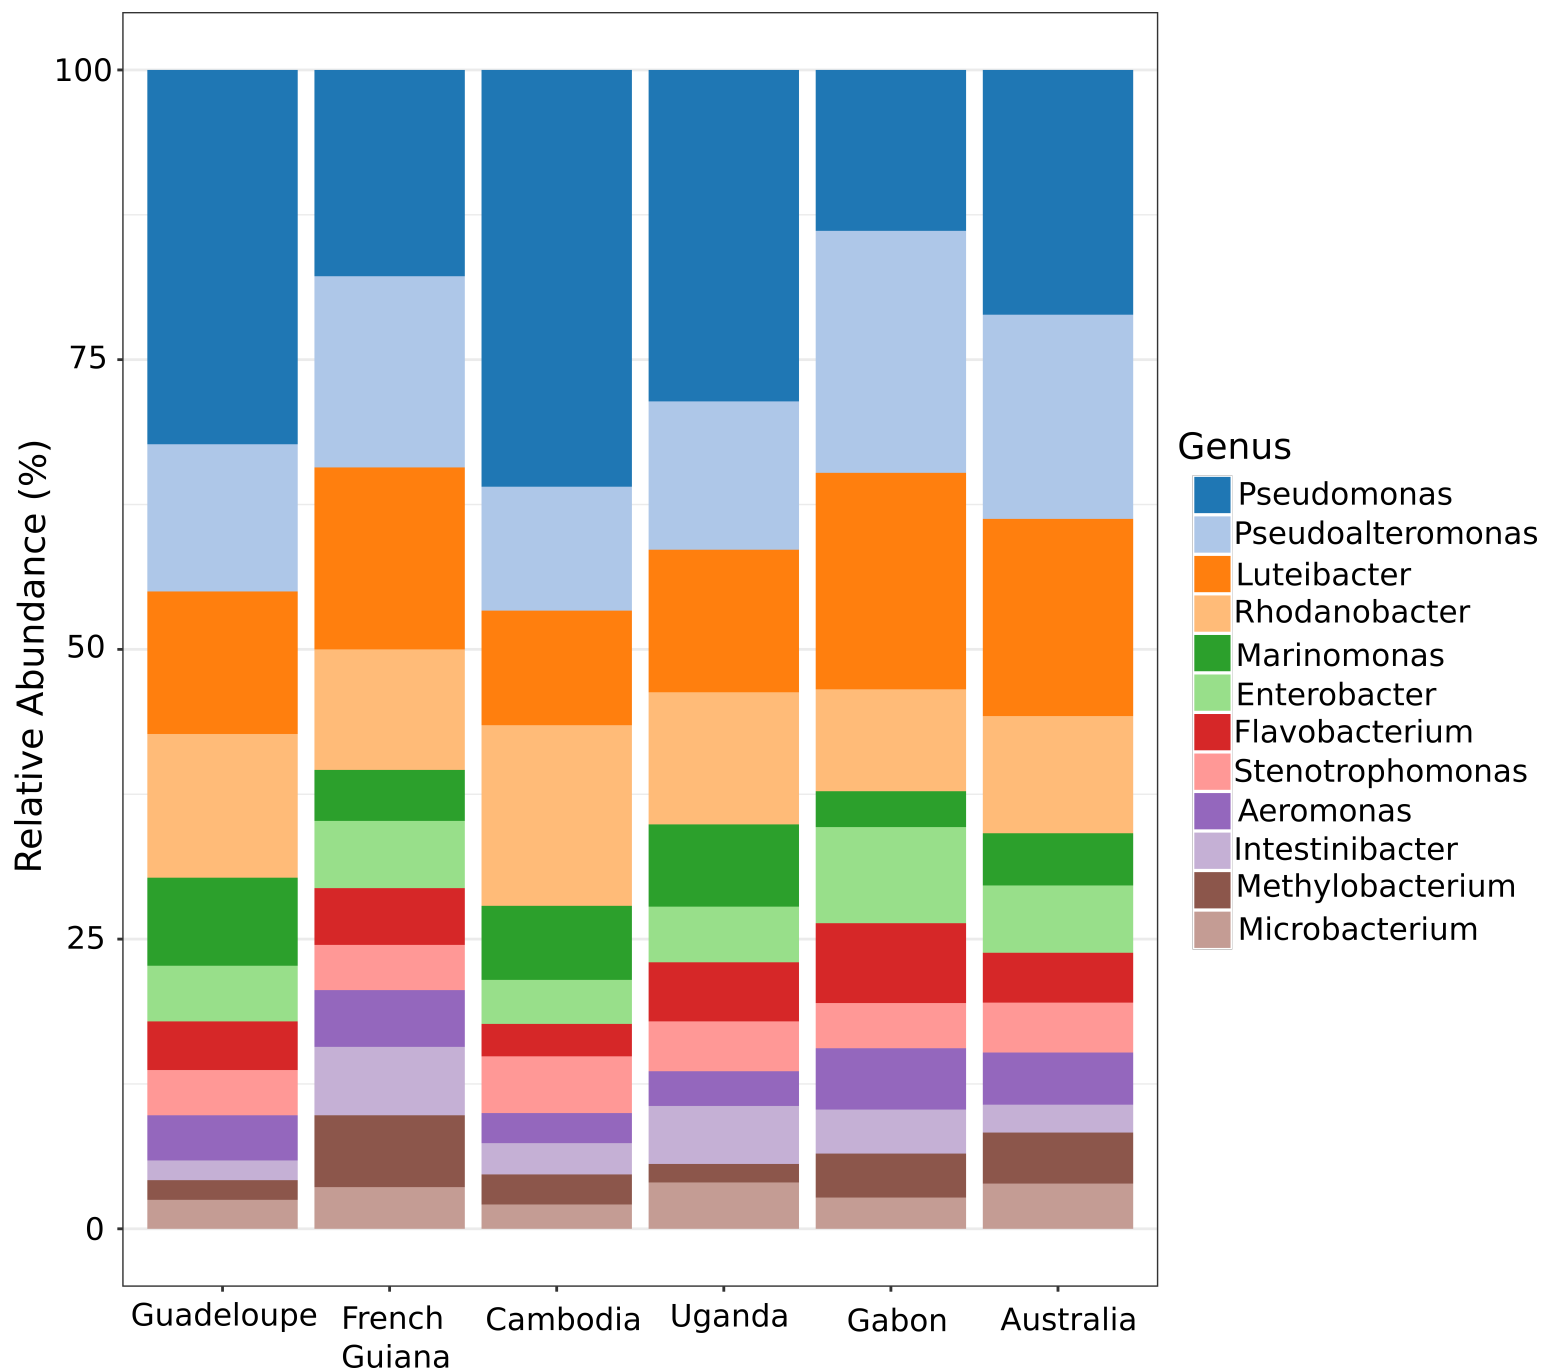

Figure 4

**a**

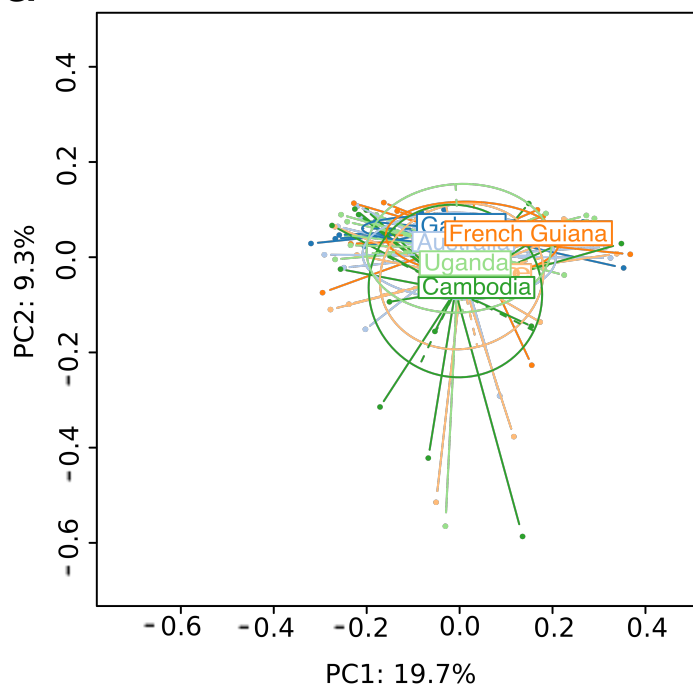

**b**

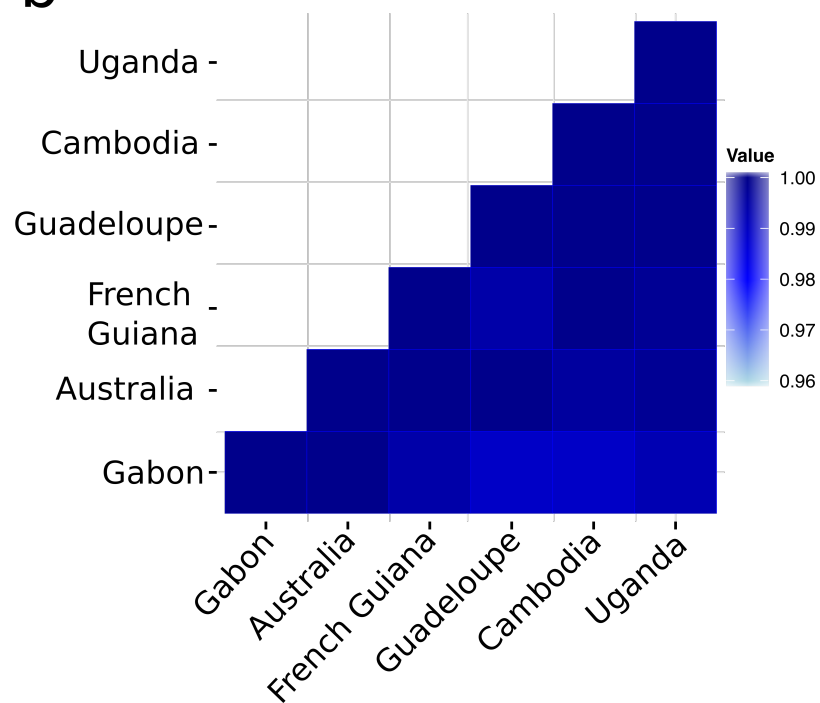

Source: http://biorxiv.org/content/10.1101/200659v1.full.pdf
